# Supplementary material for: A JAK Inhibitor for Treatment of Rheumatoid Arthritis: The Baricitinib Experience
Source: MDPI journal article supplement (doi:10.3390/jcm12134527), 2023-07-06
Supplement: s1 [file s1]

## Supplementary Materials

**Title:** A JAK Inhibitor for Treatment of Rheumatoid Arthritis: The Baricitinib Experience

**Author List:** Peter C. Taylor<sup>1</sup>, Cedric Laedermann<sup>2</sup>, Rieke Alten<sup>3</sup>, Eugen Feist<sup>4</sup>, Ernest Choy<sup>5</sup>, Ewa Haladyj<sup>2</sup>, Inmaculada De La Torre<sup>2</sup>, Pascal Richette<sup>6</sup>, Axel Finckh<sup>7</sup> and Yoshiya Tanaka<sup>8</sup>

**Affiliations:**

<sup>1</sup> Botnar Research Centre, Nuffield Department of Orthopaedics, Rheumatology, and Musculoskeletal Sciences, University of Oxford, Oxford OX3 7LD, UK

<sup>2</sup> Eli Lilly and Company, Indianapolis 46285, Indiana, USA

<sup>3</sup> Internal Medicine II, Rheumatology, SCHLOSSPARK-KLINIK, University Medicine Berlin, Berlin 14059 , Germany

<sup>4</sup> Department of Rheumatology, Helios Clinic Vogelsang-Gommern, cooperation partner of the Otto-von-Guericke University Magdeburg, Magdeburg 39245 , Germany

<sup>5</sup> Division of Infection and Immunity, Cardiff University School of Medicine, Cardiff CF14 4YS, UK

<sup>6</sup> Hôpital Lariboisière, Service de Rhumatologie, Paris, France and Université de Paris, Inserm, UMR-S 1132, Bioscar, Paris, France

<sup>7</sup> Division of Rheumatology, Department of Medicine, Geneva University Hospitals, Geneva 1205 , Switzerland

<sup>8</sup> First Department of Internal Medicine, University of Occupational and Environmental Health, Kitakyushu 807-0804, Japan

**Corresponding author:**

Peter C. Taylor

Botnar Research Centre,

Nuffield Department of Orthopaedics, Rheumatology, and Musculoskeletal Sciences,

University of Oxford,

Windmill Road,

Oxford, OX3 7LD

United Kingdom

**Supplementary Table S1.** Baseline demographics and characteristics of patients baricitinib-treated patients in real-world settings and RCTs.

|                                         | Patients, n <sup>a</sup> | Age, yrs (mean)    | Disease duration, yrs (mean) | Disease severity (mean)                              | Bio-naïve (%)     | 3rd line or more (%) | Dosage, 2 mg/day (%) | Comorbidities (%)                                                                                                   |
|-----------------------------------------|--------------------------|--------------------|------------------------------|------------------------------------------------------|-------------------|----------------------|----------------------|---------------------------------------------------------------------------------------------------------------------|
| <b>RWE</b>                              |                          |                    |                              |                                                      |                   |                      |                      |                                                                                                                     |
| <b>Baricitinib registry/multicentre</b> |                          |                    |                              |                                                      |                   |                      |                      |                                                                                                                     |
| <b>ORBIT-RA</b> (Spain) [60]            | 182                      | 62.2               | 14.6                         |                                                      | 22.0              | 36.8                 | 9.9                  | 2.4 CCI                                                                                                             |
| <b>RABBIT</b> (Germany) [67]            | 117/286 <sup>b</sup>     | 59/59 <sup>b</sup> | 11/14 <sup>b</sup>           | 4.7/4.4 <sup>b</sup> DAS28-ESR                       | 38/5 <sup>b</sup> | 25/58 <sup>b,c</sup> | 11/17 <sup>b</sup>   | NR                                                                                                                  |
| <b>BIO-REG</b> (Austria) [69]           | 74                       | 64                 | 14.1                         | 3.8 DAS28-ESR                                        | 18.9              | 37.8                 | NR                   | 65% overall<br>(25% of which was heart disease)                                                                     |
| <b>BSRBR-RA</b> (UK) [31]               | 561                      | 60.0               | 13.1                         | 5.7 DAS28-ESR                                        | 46.0              | NR                   | 15                   | NR                                                                                                                  |
| <b>IPS</b> (Italy) [64]                 | 446                      | 59                 | 9                            | 4.7 DAS28-CRP;<br>25.8 CDAI                          | 34.0              | NR                   |                      | 12.5 cardiomyopathy;<br>29.1 hypercholesterolaemia;<br>8.5 diabetes                                                 |
| <b>ANSWER</b> (Japan) [70]              | 166                      | 60.2               | 12.6                         | 4.3 DAS28-ESR                                        | 22.3              | 54.2                 | NR                   | NR                                                                                                                  |
| <b>FIRST</b> (Japan) [71]               | 138                      | 57.2               | 6.4 <sup>d</sup>             | 5.3 DAS28-ESR                                        | 32.6              | 24.6                 | 11.6                 | NR                                                                                                                  |
| <b>Iwamoto et al.</b> (Japan) [75]      | 81                       | 66 <sup>d</sup>    | 11 <sup>d</sup>              | 5.1 DAS28-ESR <sup>d</sup> ;<br>18 CDAI <sup>d</sup> | 22.2              | NR                   | NR                   | NR                                                                                                                  |
| <b>BIO-1</b> (Spain) [61]               | 63                       | 63.0               | 7.5                          | NR                                                   | NR                | NR                   | NR                   | NR                                                                                                                  |
| <b>SCQM-RA</b> (Switzerland) [62,63]    | 273                      | 59                 | 13                           | NR                                                   | NR                | NR                   | NR                   | NR                                                                                                                  |
| <b>ARTIS</b> (Sweden) [65]              | 1,420                    | 61 <sup>d</sup>    | 13 <sup>d</sup>              | 4.7 DAS28-ESR <sup>d</sup> ;<br>20 CDAI <sup>d</sup> | NR                | NR                   | NR                   | 29.8 mood disorders;<br>9.9 diabetes; 7.9 cancer;<br>5.5 severe infection;<br>4.7 obstructive lung disease; 3.0 VTE |
| <b>ARTIS</b> (Sweden) [79]              | 1,837                    | 61                 | 13.2                         | 4.3 DAS28                                            | 15                | NR                   | NR                   | 8.0 diabetes; 4.4 cancer;<br>15.1 severe infection;                                                                 |

|                                                           |                     |                   |                   |                                                            |      |      |                |                                     |
|-----------------------------------------------------------|---------------------|-------------------|-------------------|------------------------------------------------------------|------|------|----------------|-------------------------------------|
|                                                           |                     |                   |                   |                                                            |      |      |                | 4.2 obstructive lung disease        |
| <b>ARTIS</b> (Sweden) [80]                                | 1,825               | NR                | NR                | NR                                                         | NR   | NR   | NR             | NR                                  |
| <b>DANBIO</b> (Denmark) [66]                              | 275                 | 58.8              | 13.7              | 4.4 DAS28                                                  | 3.3  | NR   | NR             | NR                                  |
| <b>TBCR-RA</b> (Japan) [73,74]                            | 113                 | 66.1              | 14.0              | 3.5 DAS28-CRP                                              | 28.9 | NR   | NR             | NR                                  |
| <b>Baricitinib single centre</b>                          |                     |                   |                   |                                                            |      |      |                |                                     |
| <b>LTHT</b> (England) [81]                                | 69                  | 55.8              | 14 <sup>d</sup>   | NR                                                         | 14.5 | NR   | NR             | NR                                  |
| <b>ERLANGEN</b> (Germany) [82]                            | 139                 | 58.4              | 9.7               | 4.3 DAS28-ESR;<br>4.0 DAS28-CRP                            | 39.6 | NR   | NR             | 11.9 diabetes;<br>40.7 hypertension |
|                                                           | 93<br>(monotherapy) | 59.5              | 9.6               | 4.3 DAS28-ESR;<br>4.0 DAS28-CRP                            | 41.9 | NR   | NR             | 14.6 diabetes;<br>44.9 hypertension |
| <b>Careggi University Hospital, Florence</b> (Italy) [83] | 43                  | 56.1              | 12.6              | 5.3 DAS28-ESR;<br>4.7 DAS28-CRP                            | 27.9 |      | 4 mg/day (100) | NR                                  |
| <b>AMIENS</b> (France) [84]                               | 55                  | 58.0 <sup>d</sup> | 11.0 <sup>d</sup> | 4.2 DAS28-ESR <sup>d</sup> ;<br>4.2 DAS28-CRP <sup>d</sup> | NR   | NR   | NR             | 2.0 CCI                             |
| <b>Southampton study</b> (UK) [85]                        | 83                  | 55.3              | 14.1              | NR                                                         | NR   | NR   | NR             | NR                                  |
| <b>Daegu</b> (Korea) [86]                                 | 20                  | 53.5 <sup>d</sup> | 7.1 <sup>d</sup>  | 5.6 DAS28-ESR <sup>d</sup>                                 | 75.0 | NR   | NR             | 5.0 diabetes;<br>15.0 hypertension  |
| <b>Sapienza University of Rome</b> (Italy) [78]           | 59                  | 58.1 <sup>d</sup> | 12.0 <sup>d</sup> | 4.7 DAS28-CRP <sup>d</sup> ;<br>24 CDAI <sup>d</sup>       | 15.3 | 64.4 | 0              | NR                                  |
| <b>Baricitinib administrative claims data</b>             |                     |                   |                   |                                                            |      |      |                |                                     |
| <b>IT-NHS 2019</b> (Italy) [88]                           | 445                 | 59.2              | 8.2               | NR                                                         | 63.6 | 17.1 | NR             | 0.1 CCI                             |
| <b>IT-NHS 2018</b> (Italy) [87]                           | 149                 | 57.6              | NR                | NR                                                         | 51.0 | 8.1  | NR             | NR                                  |
| <b>JAKi registry</b>                                      |                     |                   |                   |                                                            |      |      |                |                                     |
| <b>BIOBADASER 3.0</b> (Spain) [89]                        | NR                  | NR                | NR                | NR                                                         | NR   | NR   | NR             | NR                                  |
| <b>BIOBADASAR 3.0</b> (Argentina) [90]                    | 4,817               | NR                | NR                | NR                                                         | NR   | NR   | NR             | NR                                  |
| <b>SCQM</b> (Switzerland) [91]                            | 81                  | NR                | 15 <sup>d</sup>   | 3.7 DAS28-CRP;                                             | 27.2 | 39.5 | NR             | NR                                  |

|                                                                  |                                                |                  |                  |                                                            |      |      |      |                                                        |
|------------------------------------------------------------------|------------------------------------------------|------------------|------------------|------------------------------------------------------------|------|------|------|--------------------------------------------------------|
|                                                                  |                                                |                  |                  | 16.8 CDAI                                                  |      |      |      |                                                        |
| <b>ARTIS</b> (Sweden) [80]                                       | 2150                                           | 60 <sup>d</sup>  | 13 <sup>d</sup>  | 4.7 DAS28-ESR <sup>d</sup> ;<br>4.4 DAS28-CRP <sup>d</sup> | NR   | NR   | NR   | 10 diabetes                                            |
| <b>OPAL</b> (Australia) [92]                                     | 3,850                                          | NR               | NR               | NR                                                         | NR   | NR   | NR   | NR                                                     |
| <b>RABBIT</b> (Germany) [68]                                     | 2,030                                          | 59.9             | 12.6             | 4.2 DAS28-ESR                                              | NR   | NR   | NR   | 2.9 sum of comorbidities                               |
| <b>RABBIT</b> (Germany) [93]                                     | NR                                             | >70 <sup>e</sup> | NR               | NR                                                         | NR   | NR   | NR   | NR                                                     |
| <b>FIRST</b> (Japan) [72]                                        | 387                                            | 58.1             | 7.3 <sup>d</sup> | 26.0 CDAI                                                  | NR   | NR   | NR   | NR                                                     |
| <b>JAKi pooled registries</b>                                    |                                                |                  |                  |                                                            |      |      |      |                                                        |
| <b>JAK-Pot</b> (Multinational) [94]                              | 9,329                                          | 57.6             | 13.7             | 4.7 DAS28;<br>23.7 CDAI                                    | 28.2 | 48.9 | NR   | 52.7 with ≥1<br>comorbidity                            |
| <b>JAK-Pot</b> (Multinational) [95]                              | 2,000                                          | NR               | NR               | NR                                                         | NR   | NR   | NR   | NR                                                     |
| <b>JAKi administrative claims data</b>                           |                                                |                  |                  |                                                            |      |      |      |                                                        |
| <b>VIGIBASE</b> (Multinational) [96]                             | 39,097                                         | 60.6             | NR               | NR                                                         | NR   | NR   | NR   | NR                                                     |
| <b>SNDS</b> (France) [97]                                        | 8,481                                          | 59.3             | NR               | NR                                                         | 33.0 | 22.9 | NR   | 10.8 diabetes; 22.3<br>hypertension; 4.3<br>malignancy |
|                                                                  | Baricitinib:<br>5065                           | NR               | NR               | NR                                                         | NR   | NR   | 20.5 | NR                                                     |
| <b>SNDS</b> (France) [98]                                        | 5,870<br>(baricitinib:<br>3,110; RA:<br>5,497) | 58.0             | NR               | NR                                                         | NR   | NR   | NR   | NR                                                     |
| <b>Baricitinib observational study</b>                           |                                                |                  |                  |                                                            |      |      |      |                                                        |
| <b>PMS study</b> (Japan) [76]                                    | 4,731                                          | 63.9             |                  |                                                            | 28.9 |      | 35   |                                                        |
| <b>RA-BE-REAL</b> (Multinational) six<br>months [77]             | 509                                            | 59.1             | 9.1              | 5.2 DAS28                                                  | 48.1 |      |      |                                                        |
| <b>B023</b> (Multinational: multi-<br>source meta-analysis) [34] | 7,606                                          | NR               | NR               | NR                                                         | NR   | NR   | NR   | NR                                                     |
| <b>Clinical trials</b>                                           |                                                |                  |                  |                                                            |      |      |      |                                                        |
| <b>RA-BEAM</b> (International) [6]                               | 487                                            | 54               | 10               | 6.5 DAS28-ESR;                                             | 100  | 0    | 0    | NR                                                     |

|                                      |     |      |      |                                 |   |    |    |    |
|--------------------------------------|-----|------|------|---------------------------------|---|----|----|----|
|                                      |     |      |      | 5.8 DAS28-CRP                   |   |    |    |    |
| <b>RA-BEACON</b> (International) [8] | 351 | 56.0 | 14.0 | 6.6 DAS28-ESR;<br>5.9 DAS28-CRP | 0 | NR | 50 | NR |

Data are reported as mean values or percentages, unless otherwise indicated.

<sup>a</sup>Number of patients receiving baricitinib or JAKi; patients could be included in multiple studies.

<sup>b</sup>Patients treated with baricitinib and new to RABBIT/Switchers to baricitinib while in RABBIT.

<sup>c</sup>Fourth-line or more.

<sup>d</sup>Median values.

<sup>e</sup>Analysis only included patients aged >70 years.

ANSWER, Kansai Consortium for Well-being of Rheumatic Disease Patients (major university-related hospitals: Kyoto University, Osaka University, Osaka Medical College, Kansai Medical University, Kobe University, Nara Medical University and Osaka Red Cross Hospital); ARTIS, Anti-Rheumatic Therapy in Sweden (the Swedish Rheumatology Quality [SRQ] register); BIO-REG: Australian Registry for Biologicals, Biosimilars and tsDMARDs in Rheumatology; B023, metanalysis of patients coming from registries (CorEvitas US, ARTIS, CorEvitas Japan) and administrative claim (Aetna/Healthagen, Anthem [HIRD], HealthVerity PS20, Humana, Marketscan, MDR, Optium Clinformatics, PharMetrics Plus, BKK, JMDC and SNDS); BKK, Betriebskrankenkasse; BSRBR-RA, British Society for Rheumatology Biologics Register for Rheumatoid Arthritis; CCI, Charlson Comorbidity Index; CDAI, Clinical Disease Activity Index; DAS28, Disease Activity Score in 28 joints; DAS28-CRP, DAS28-C-reactive protein; DAS28-ESR, DAS28-erythrocyte sedimentation rate; HIRD, HealthCore Integrated Research Database; IPS, Italian prospective study in 11 centres (Division of Rheumatology and Clinical Immunology, Humanitas Clinical and Research Center – IRCCS, Rozzano, Milan; Rheumatology, Azienda Ospedaliera Universitaria Integrata, Verona, University of Verona; Rheumatology, IRCCS San Raffaele Scientific Institute, Milan and Vita-Salute San Raffaele University, Milan; Rheumatology, Azienda Sanitaria Universitaria Integrata, Udine and University of Udine; Internal Medicine, AOU San Giovanni di Dio e Ruggi d'Aragona, Salerno; Rheumatology, Policlinico Le Scotte, University of Siena; Rheumatology, Allergy and Clinical Immunology, Department of Medicina dei Sistemi, University of Rome Tor Vergata; Rheumatology and Clinical Immunology, Spedali Civili, Brescia; Rheumatology, ASST Papa Giovanni XXIII, Bergamo; Rheumatology, San Gerardo Hospital, Monza; Humanitas University, Department of Biomedical Sciences, Pieve Emanuele, Milan; Rheumatology, ASL3 Genovese, Genova, Italy); IT-NHS 2018, administrative databases from selected Italian settings, including the 'beneficiaries' database' containing patients' demographic data and 'pharmaceutical databases' (inpatient and out-patient) providing data on prescriptions; IT-NHS 2019, integrated administrative databases from a pool of Italian entities from Veneto, Marche, Abruzzo, Apulia and Calabria Regions; JMDC, JMDC, Inc.'s claims database; LTHT, Leeds Teaching Hospitals NHS Trust database; MDR, military health system data repository; OPAL, Optimising Patient outcome in Australian Rheumatology; PMS, post-marketing surveillance – mandated in Japan; RCTs, randomised controlled trials; RWE, real-world evidence; SCQM, Swiss Clinical Quality Management in Rheumatic Diseases Foundation; SNDS, Système National des Données de Santé (French national health data system); TBCR, Tsurumai Biologics Communication Registry; VTE, venous thromboembolism.
